# Supplementary material for: The application of the propensity score matching method in stock prediction among stocks within the same industry
Source: PeerJ journal article supplement (doi:10.7717/peerj-cs.1819), 2024-01-30
Supplement: Figure_S5.pdf [file Figure_S5.pdf]

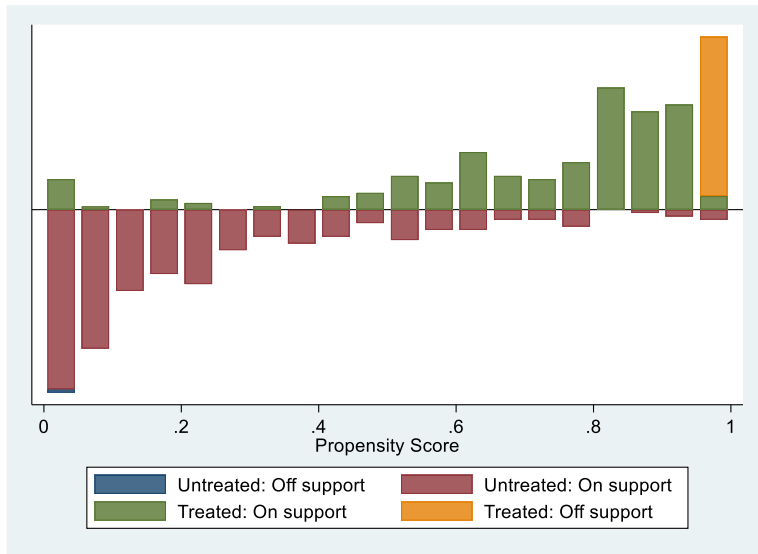

(a)

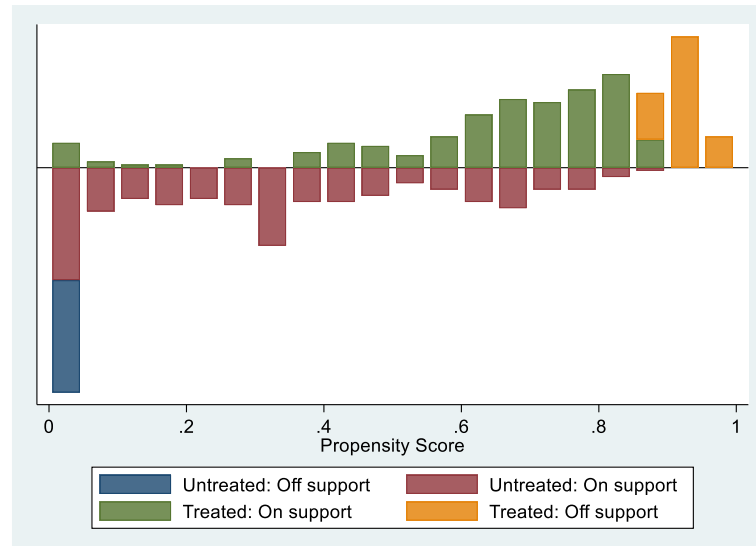

(b)

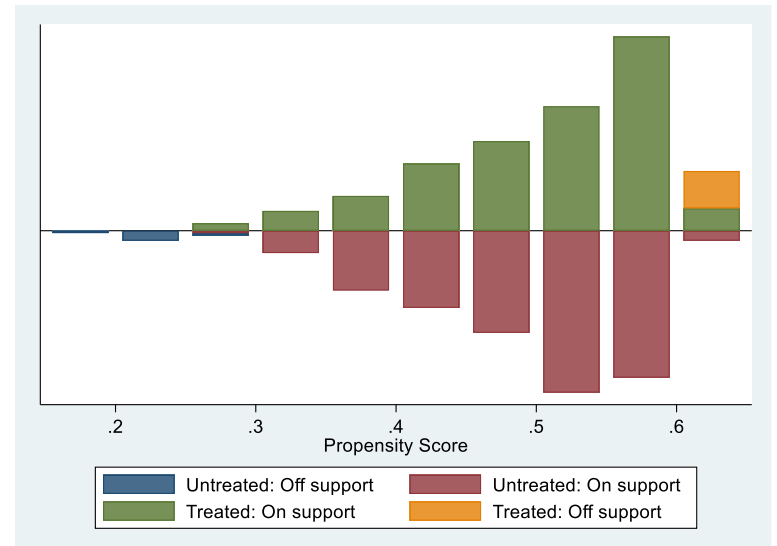

(c)
