# Supplementary material for: The application of the propensity score matching method in stock prediction among stocks within the same industry
Source: PeerJ journal article supplement (doi:10.7717/peerj-cs.1819), 2024-01-30

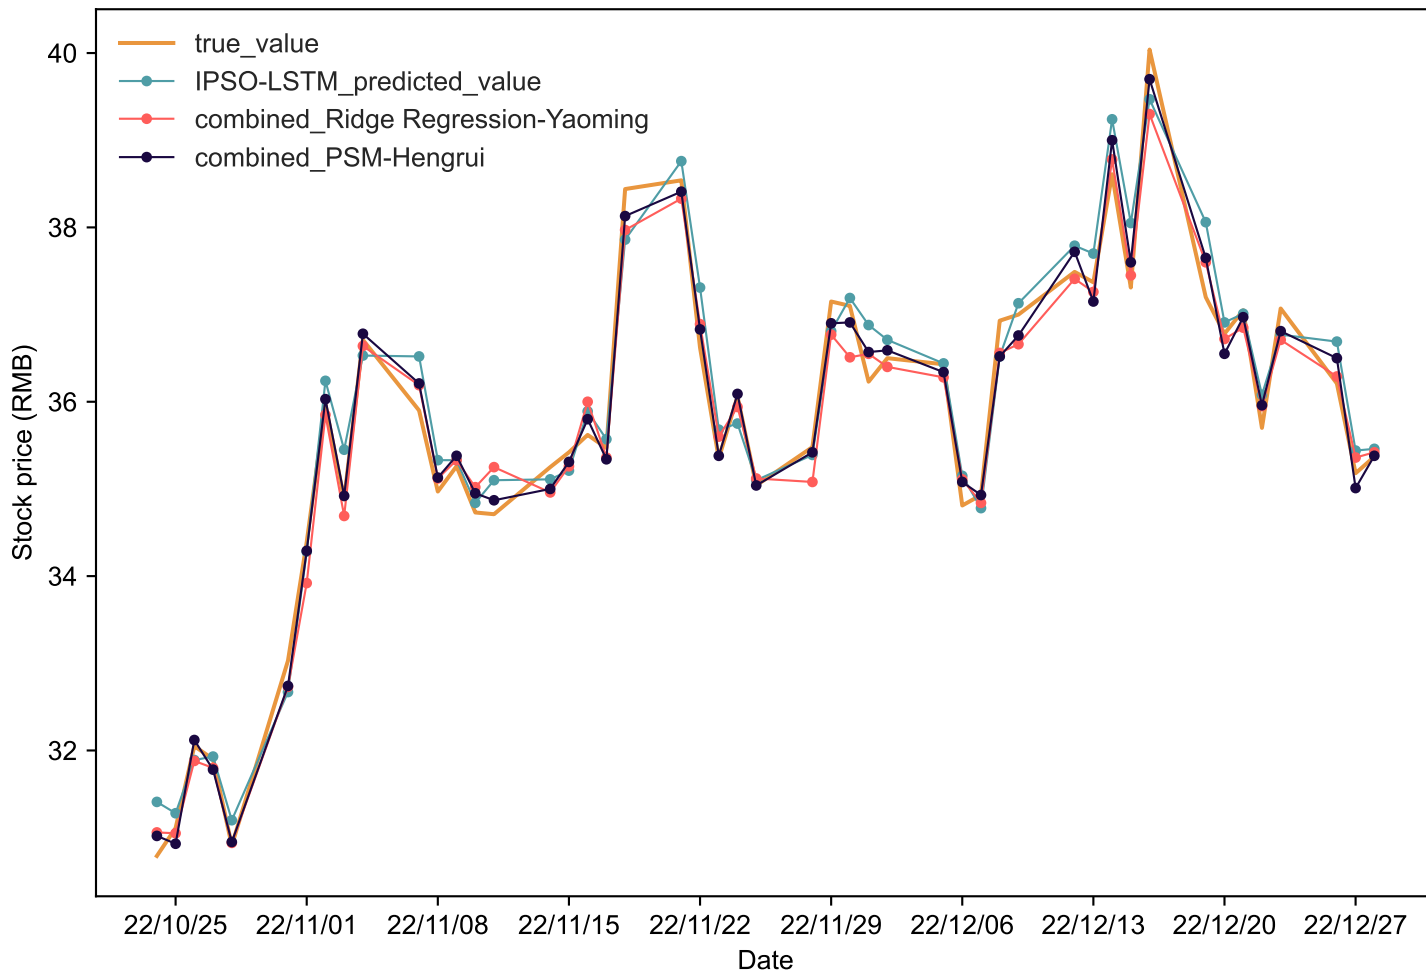

Supplement: Figure_S9-3.pdf [file Figure_S9-3.pdf]
